# Supplementary material for: Development of a new paper-based voltage step electrocoagulation technique and application to wine classification
Source: Royal Society of Chemistry journal article supplement (doi:10.1039/d2ay01267g), 2022-01-01
Supplement: d2ay01267g1.pdf [file d2ay01267g1.pdf]

(Supporting information)

**Development of a new paper-based voltage step electrocoagulation technique and application for wine classification**

Manoon Phichi<sup>1</sup>, Pattaporn Chobpradit<sup>1</sup>, Thumnoon Nhujak<sup>1</sup>, Wanlapa Aeungmaitrepirom<sup>1</sup>, Chadin Kulsing<sup>1,2\*</sup>

<sup>1</sup> Department of Chemistry, Faculty of Science, Chulalongkorn University, Bangkok 10330, Thailand

<sup>2</sup> Special Task Force for Activating Research (STAR) in Flavor Science, Chulalongkorn University, Phayatai Rd., Wangmai, Pathumwan, Bangkok 10330, Thailand.

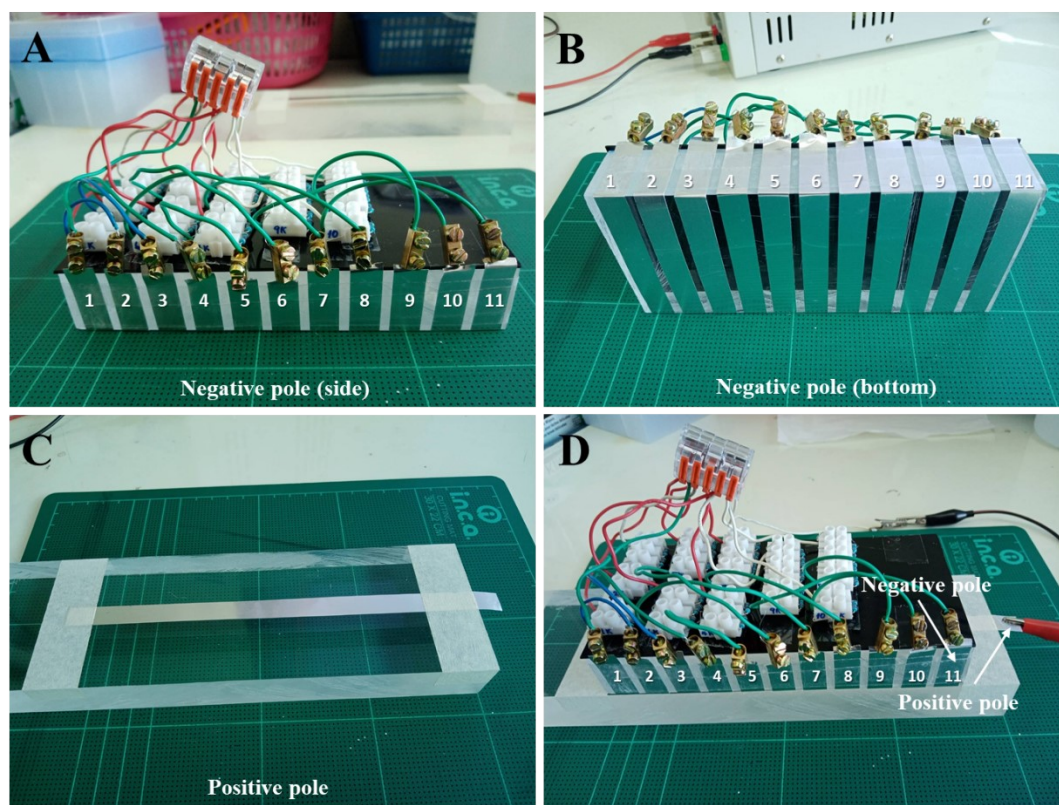

**Fig. S1** pictures of proposed device including (A) negative pole (side), (B) negative pole (bottom), (C) positive pole, and (D) usage picture of proposed device.

**Table S1** The information of 15 wine samples obtained from the local department stores in Thailand

| <b>VSEC group</b> | <b>Name code</b>   |              | <b>Origin</b>                | <b>% Alcohol (v/v)</b> | <b>Production year</b> | <b>Raw materials</b> | <b>Types</b> |
|-------------------|--------------------|--------------|------------------------------|------------------------|------------------------|----------------------|--------------|
|                   | <b>Wine sample</b> | <b>Brand</b> |                              |                        |                        |                      |              |
| <b>(i)</b>        | <i>4</i>           | C3           | McLaren Vale, Australia      | 14.9                   | 2015                   | Shiraz grape         | Red wine     |
|                   | <i>7</i>           | S1           | Pattaya, Thailand            | 14.5                   | 2014                   | Shiraz grape         | Red wine     |
|                   | <i>5</i>           | G1           | Khao Yai, Thailand           | 13                     | 2014                   | Syrah grape          | Red wine     |
| <b>(ii)</b>       | <i>2</i>           | S1           | Pattaya, Thailand            | 13                     | 2012                   | Shiraz grape         | Red wine     |
| <b>(iii)</b>      | <i>3</i>           | C1           | Loei, Thailand               | 12.5                   | 2014                   | Shiraz grape         | Red wine     |
|                   | <i>1</i>           | P1           | Khao Yai, Thailand           | 14.5                   | 2012                   | Shiraz grape         | Red wine     |
|                   | <i>9</i>           | F1           | Languedoc-Roussillon, France | 13                     | 2016                   | Syrah grape          | Red wine     |
|                   | <i>12</i>          | C2           | Sydney, Australia            | 10                     | 2020                   | Shiraz/Syrah grape   | Red wine     |
| <b>(iv)</b>       | <i>6</i>           | K1           | Thailand                     | 12                     | 2013                   | Black opal grape     | Red wine     |
|                   | <i>13</i>          | G1           | Khao Yai, Thailand           | 14                     | 2011                   | Syrah grape          | Red wine     |
| <b>(v)</b>        | <i>10</i>          | C1           | Loei, Thailand               | 12.5                   | 2013                   | Shiraz grape         | Red wine     |
|                   | <i>11</i>          | S1           | Pattaya, Thailand            | 12.5                   | 2015                   | Chenin Blanc grape   | White wine   |
|                   | <i>14</i>          | K1           | Thailand                     | 12                     | 2014                   | Mangosteen           | Fruit wine   |
|                   | <i>15</i>          | K1           | Thailand                     | 12                     | 2015                   | Lychee               | Fruit wine   |
| <b>(vi)</b>       | <i>8</i>           | M1           | Thailand                     | 12                     | 2017                   | Mangosteen           | Fruit wine   |

**Table S2** The potential differences of each plate of the CAS. These results were calculated from the linear regression line as shown in **Fig. S2**

| Plate No. | Voltages |
|-----------|----------|
| 1         | 0.915    |
| 2         | 0.929    |
| 3         | 0.901    |
| 4         | 0.902    |
| 5         | 0.894    |
| 6         | 0.874    |
| 7         | 0.843    |
| 8         | 0.852    |
| 9         | 0.818    |
| 10        | 0.816    |
| 11        | 0.800    |

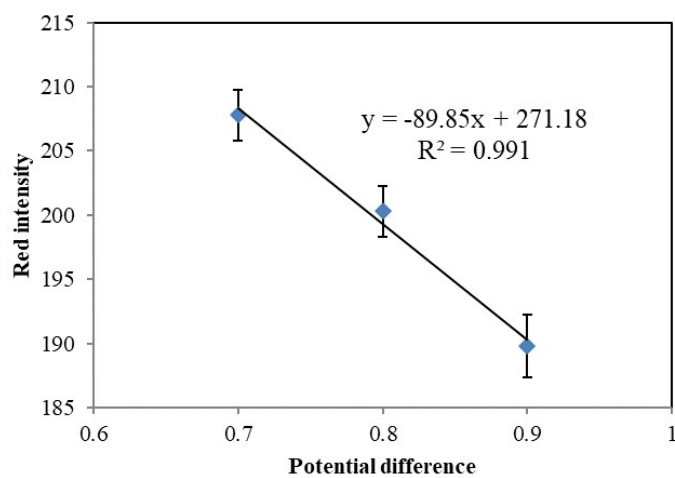

**Fig. S2** the linear regression line obtained from the single plate electrode

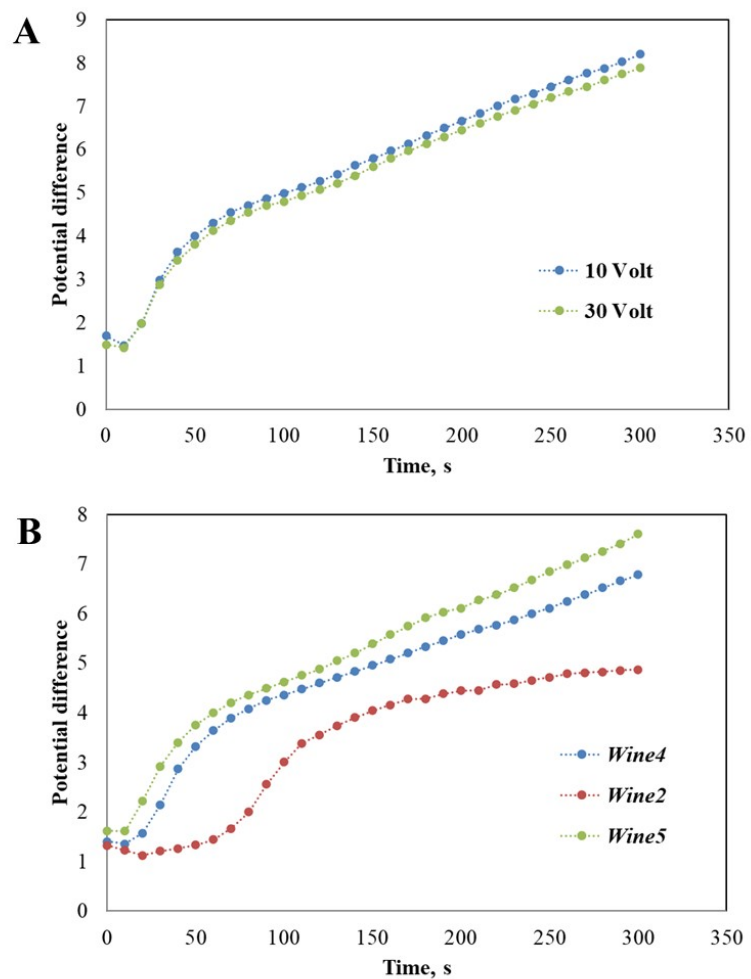

**Fig. S3** (A) the VSEC voltage profiles as function of times of the proposed electrode applying the maximum voltages of 10 and 30 V to maintain constant current of 0.005 A, and (B) the corresponding profiles at constant 0.005 A (10 V of maximum current) of three wine samples.

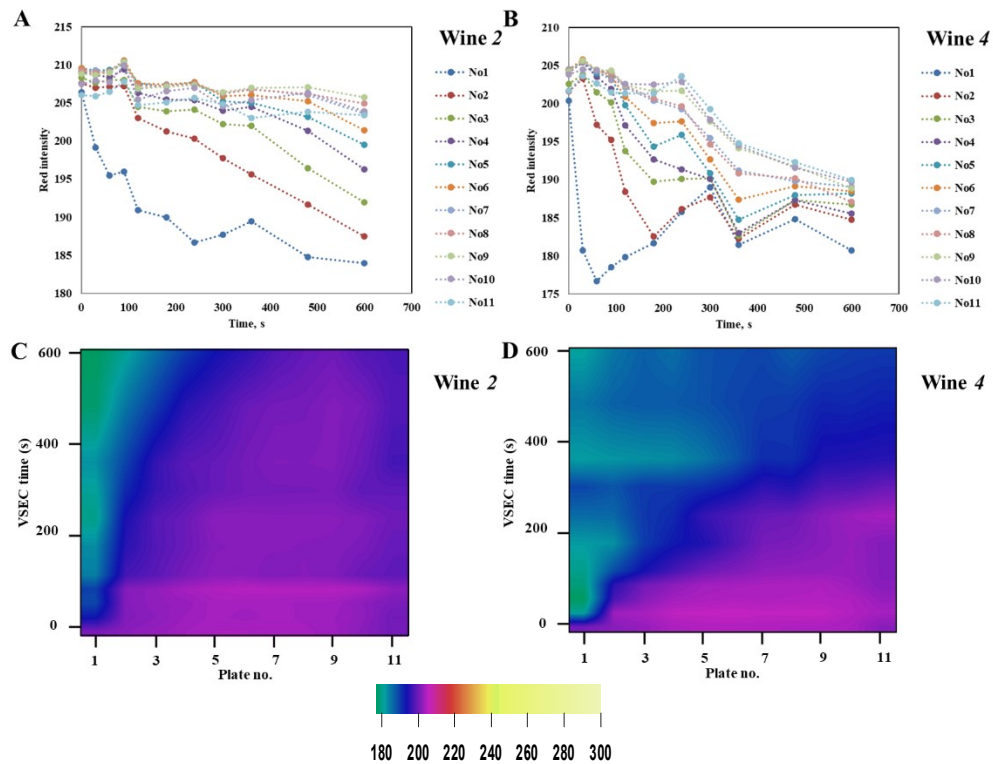

**Fig. S4** effect of VSEC times on the red color intensity of filter paper on each plate of CAS (no.1-11, experiencing higher to lower voltages, respectively) after applying constant current of 0.005 A (with 10 V maximum voltage) to treat wines (A) 2 and (B) 4. The corresponding contour plots were shown in (C) and (D), respectively, with the color scale provided below.

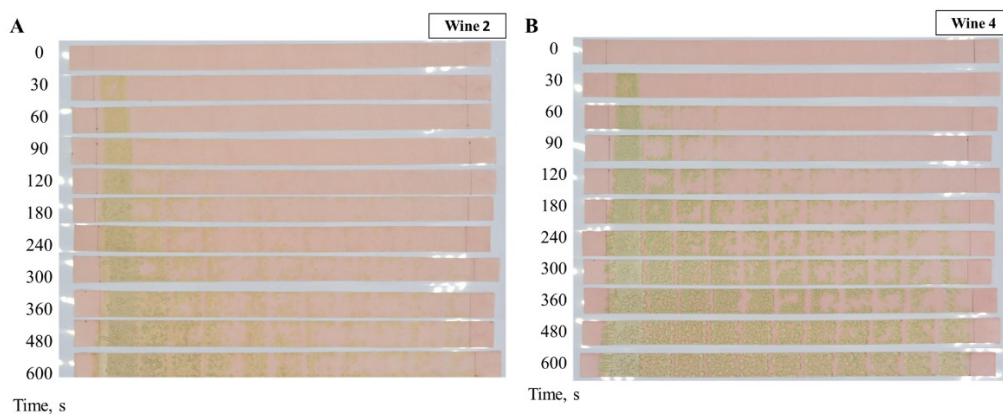

**Fig. S5** the pictures of wine-soaked filter paper after VSEC applying constant current of 0.005 A (10 V of maximum voltage) with different times for (A) wine 2 and (B) wine 4.

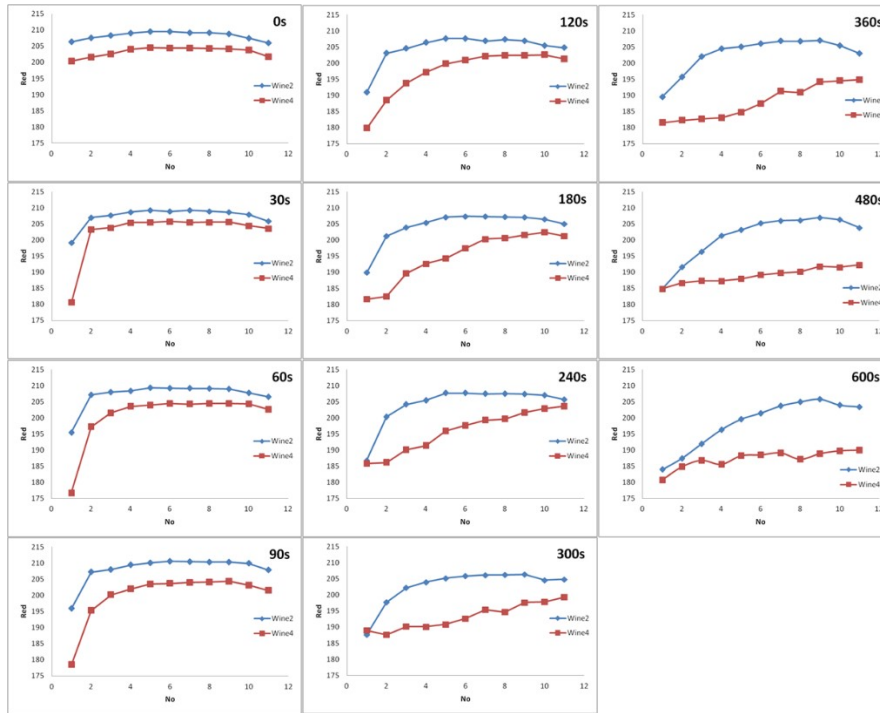

**Fig. S6** the overlaid plots of plot profiles from wine 2 and 4 samples at different VSEC time.

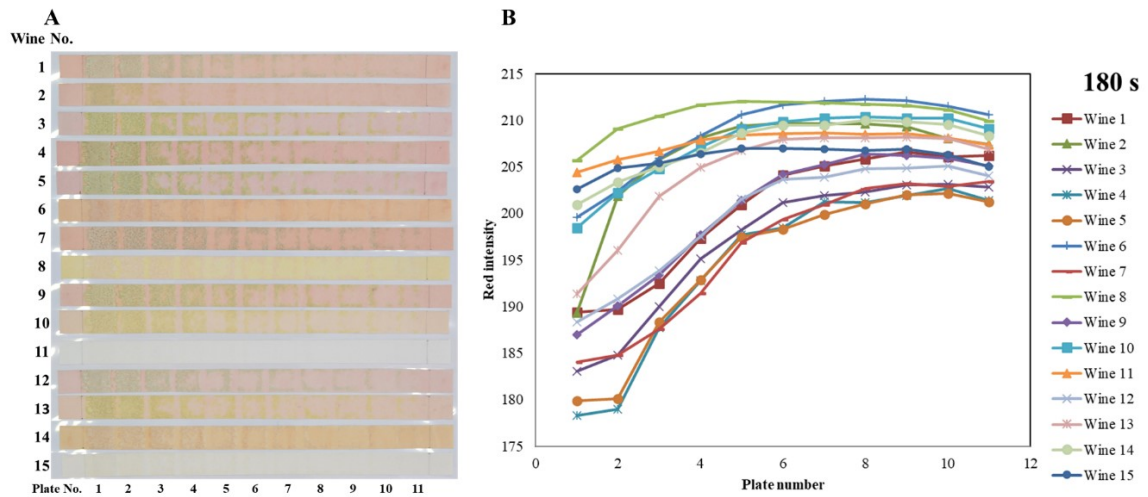

**Fig. S7** the pictures (A) and plot profiles (B) of soaked filter papers of 15 wines sample after VSEC applying constant current of 0.005 A (10 V of maximum voltage) for 3 min.



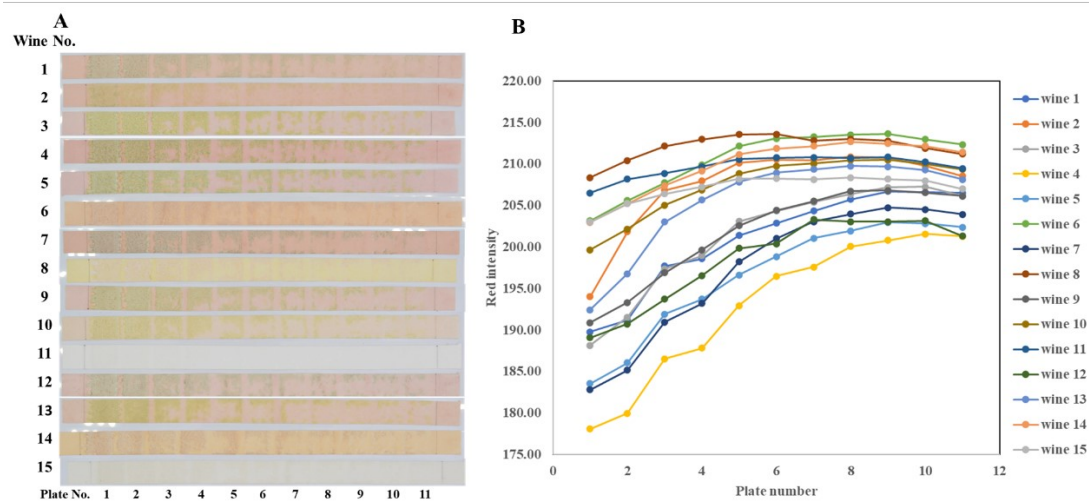

**Fig. S8** the pictures (A) and plot profiles (B) of soaked filter papers of 15 wines sample after VSEC applying constant voltage of 10 V (0.020 A of maximum current) for 2 min.

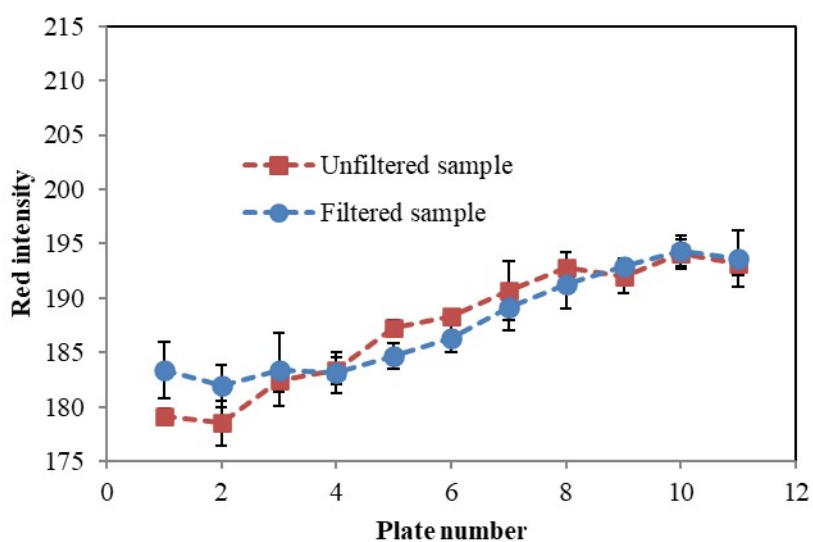

**Fig. S9.** the plot profiles from filtered and unfiltered wine samples. The wine-soaked filter papers were treated with VSEC applying constant current of 0.005 A (10 V of maximum voltage) for 5 min.

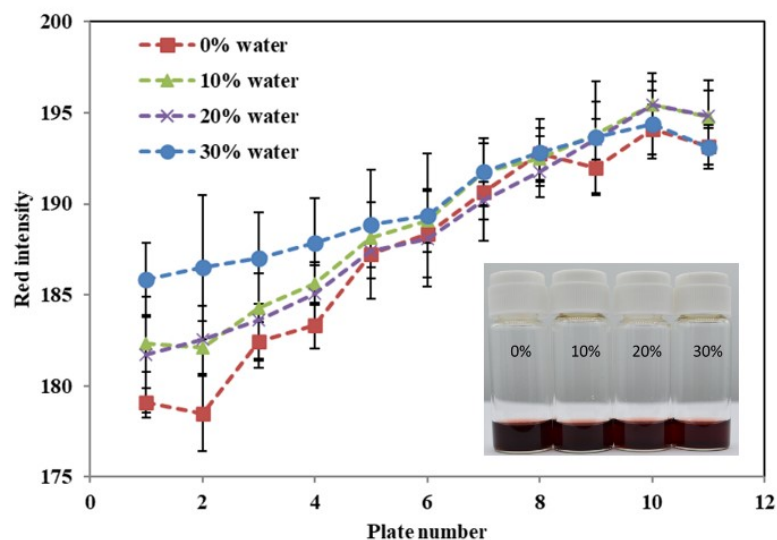

**Fig. S10** the VSEC results (plate no. vs intensity profiles) of the wine samples without and with different dilutions. The wine-soaked filter papers were treated at constant 0.005 A (10 V of maximum voltage) for 5 min. The error bars were obtained with  $n = 3$ .

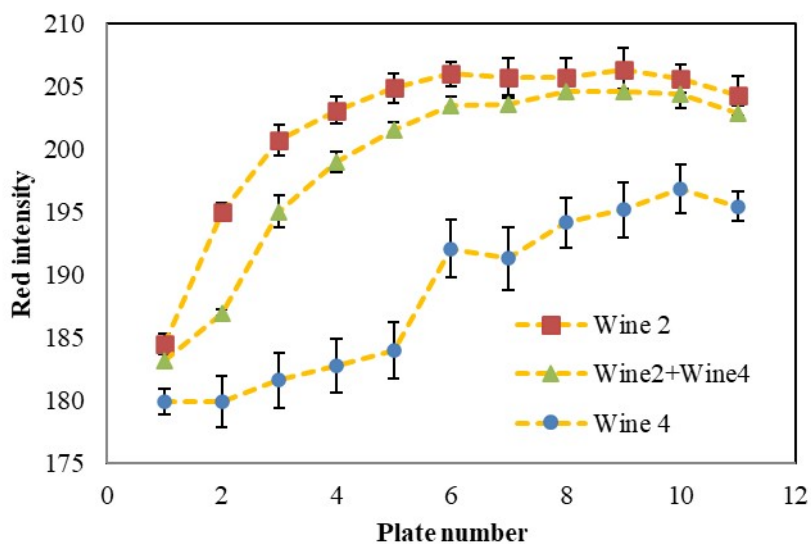

**Fig. S11** the VSEC results (plate no. vs intensity profiles) of wine 2, wine 4 and the mixed wine (1:1 v:v, wine 2 + wine 4). The wine-soaked filter papers were treated at constant 0.005 A (10 V of maximum voltage) for 5 min. The error bars were obtained with  $n = 3$ .



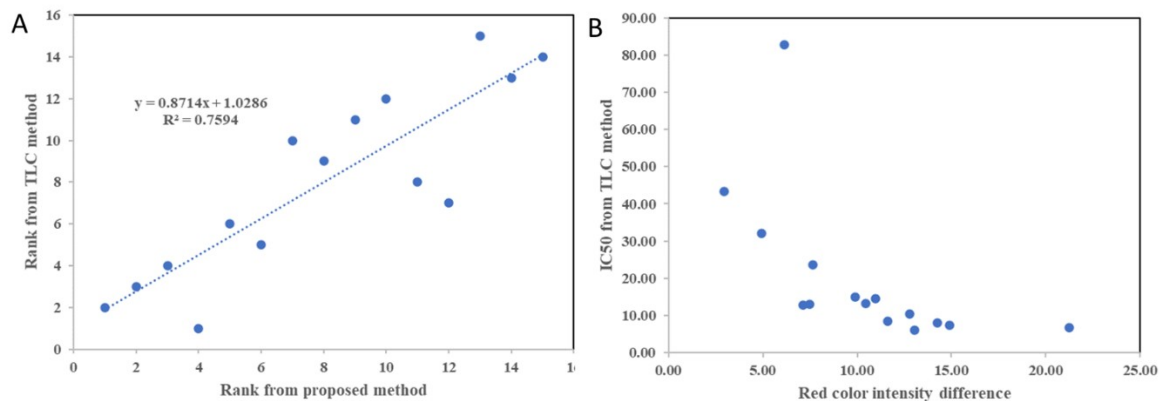

**Fig. S12** (A) the correlation plot between the ranking of VSEC red color intensity differences and the IC<sub>50</sub> ranking from the TLC based antioxidant test method and (B) the corresponding plot of IC<sub>50</sub> against the red color intensity differences.

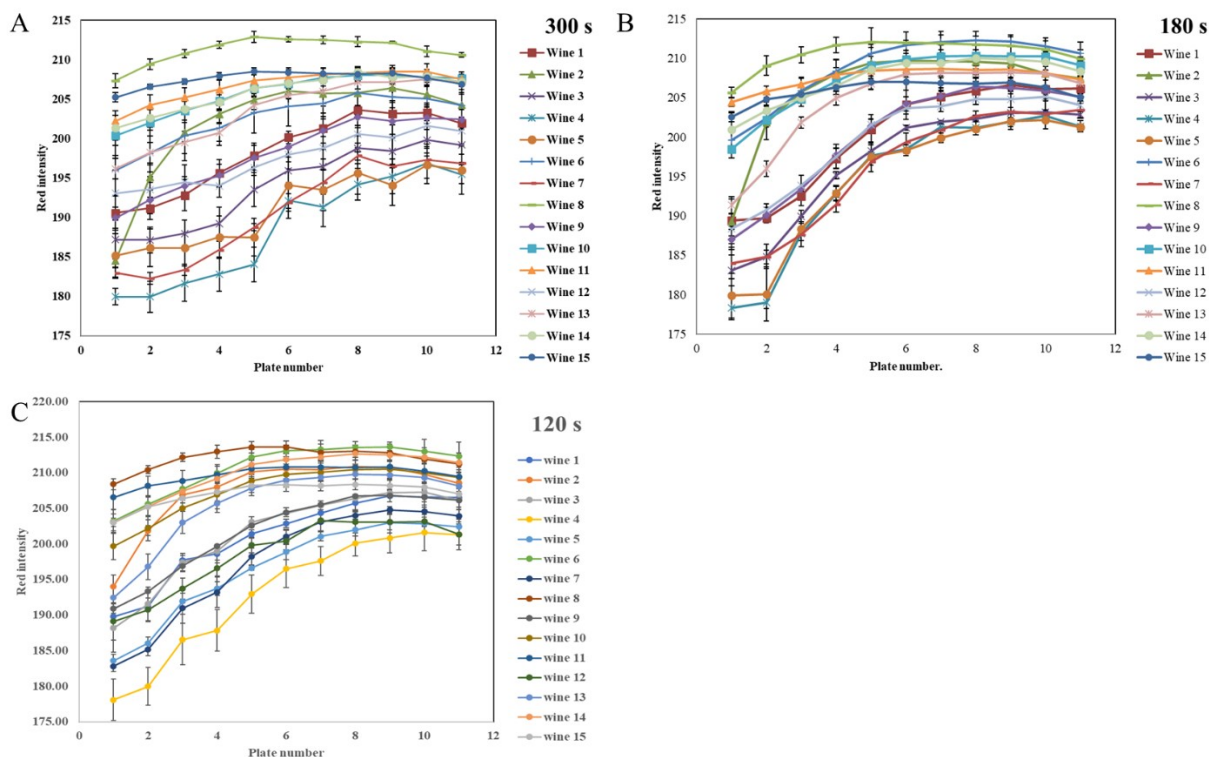

**Fig. S13** the plot profiles in different VSEC conditions with error bar (n=3) corresponding to Fig. 5B, Fig. S7B, and Fig. S8B were shown in (A), (B), and (B) respectively.
